# Supplementary material
Source: publisher figshare collection journal article supplement (https://acs.figshare.com/ndownloader/files/4087090)
Supplement: Supplementary file 1 [file 4087090]

Supporting Information for

**Gate-tunable large negative tunnel magnetoresistance  
in Ni-C<sub>60</sub>-Ni single molecule transistors**

Kenji Yoshida<sup>1\*)</sup>, Ikutaro Hamada<sup>2,3)</sup>, Shuichi Sakata<sup>1)</sup>, Akinori Umeno<sup>1)</sup>,  
Masaru Tsukada<sup>2,3)</sup> and Kazuhiko Hirakawa<sup>1,3\*\*)</sup>

<sup>1</sup>Institute of Industrial Science and Institute for Nano Quantum Information Electronics,  
University of Tokyo, 4-6-1 Komaba, Meguro-ku, Tokyo 153-8505, Japan

<sup>2</sup>Advanced Institute for Materials Research (AIMR), Tohoku University, Sendai  
980-8577, Japan

<sup>3</sup>CREST-Japan Science and Technology Agency, Kawaguchi, Saitama 332-0012, Japan

\*Email: kyoshida@iis.u-tokyo.ac.jp

\*\*Email: hirakawa@iis.u-tokyo.ac.jp

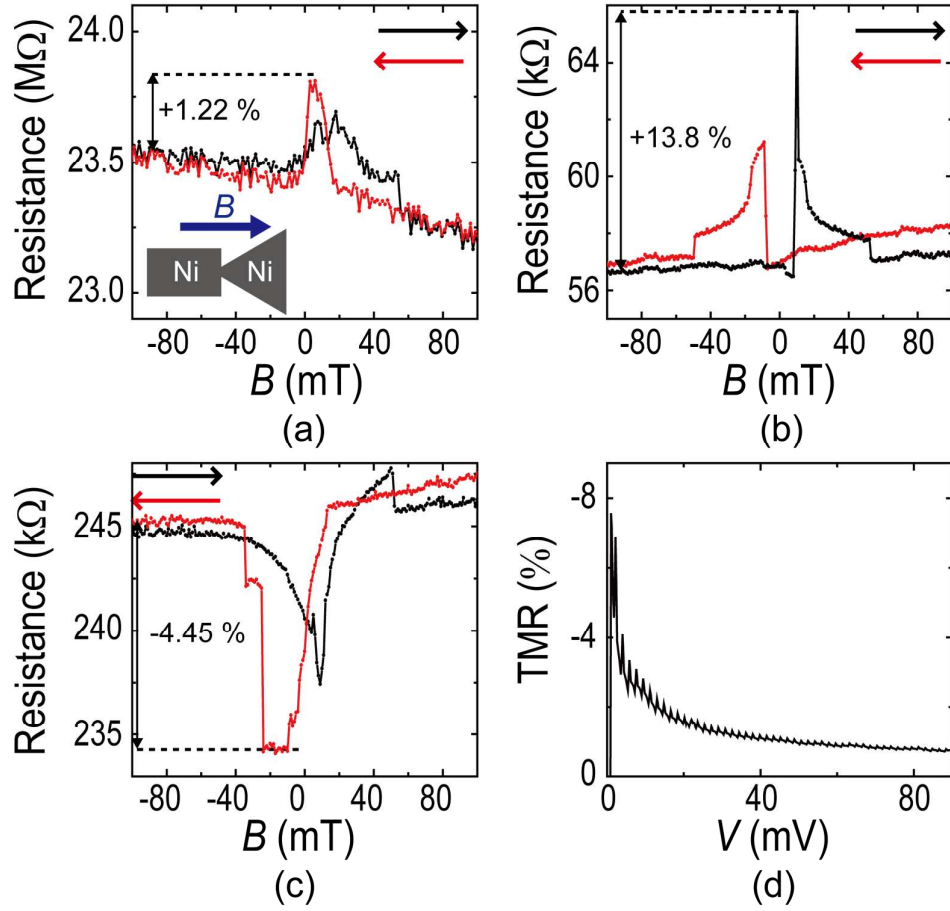

Figure S1. (a)-(c) Magnetoresistance (MR) curves of three different bare Ni tunnel junctions (Ni-TJs) fabricated by using the electrical break junction method. Bias voltages,  $V$ , were set to be (a) 5 mV, (b) -5 mV, and (c) -11.8 mV. The MR ratios are (a) +1.22 %, (b) +13.8 %, and (c) -4.45%. The inset in (a) shows a schematic geometry of a pair of Ni electrodes and an applied B-field (in-plane and parallel to the current). The black (red) arrows in (a)-(c) indicate the directions of  $B$ -field sweep. (d) Tunnel magnetoresistance (TMR) as a function of  $V$  for (c). All the measurements were carried out at 0.3K.
